# Supplementary material for: A meta-analysis of prognostic roles of molecular markers in papillary thyroid carcinoma
Source: PubMed Central journal article supplement — Endocr Connect. 2017 Feb 20;6(3):R8–R17. doi: 10.1530/EC-17-0010 (PMC5424840; doi:10.1530/ec-17-0010), 2017-02-20

**Supplementary Figure 1. Funnel plot of effect of *BRAF* mutations on DFS showed no evidence of asymmetry. Egger's regression test indicated no presence of publication bias (p = 0.319)**

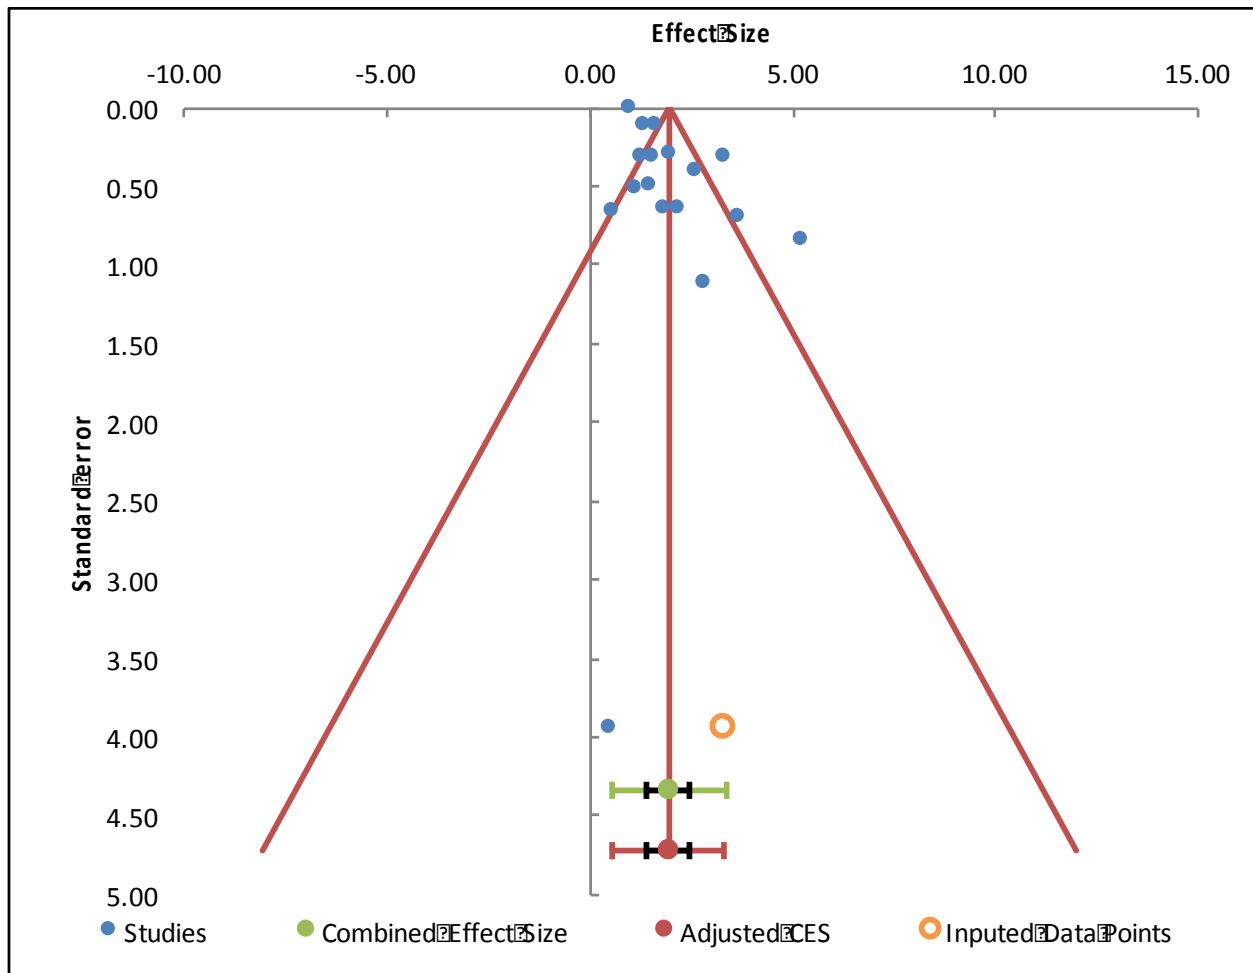

Supplement: ec-6-R8-s001.pdf [file ec-6-R8-s001.pdf]
