# Supplementary material for: A meta-analysis of prognostic roles of molecular markers in papillary thyroid carcinoma
Source: PubMed Central journal article supplement — Endocr Connect. 2017 Feb 20;6(3):R8–R17. doi: 10.1530/EC-17-0010 (PMC5424840; doi:10.1530/ec-17-0010), 2017-02-20
Supplement: ec-6-R8-t001.pdf [file ec-6-R8-t001.pdf]

## SUPPLEMENTARY TABLES

**Supplementary Table 1. Characteristics of included studies**

| Author                | Institution                                       | Genetic events | Detection Method                                  | Total number of patients | Mean age (years)  | Median follow-up (months) |
|-----------------------|---------------------------------------------------|----------------|---------------------------------------------------|--------------------------|-------------------|---------------------------|
| Abubaker 2008 (61)    | King Faisal Specialist Hospital                   | BRAF           | Direct sequencing                                 | 296                      | ND                | ND                        |
| Alzahrani 2013 (23)   | John Hopkins University                           | BRAF           | Direct sequencing                                 | 281                      | 44 <sup>a</sup>   | 35                        |
| Bullock 2015 (62)     | Royal North Shore Hospital                        | TERT           | Direct sequencing                                 | 80                       | 47.3              | 106                       |
| Costa 2008 (30)       | Multicenter (Spain)                               | BRAF<br>RAS    | PCR-SSCP                                          | 49                       | ND                | 131                       |
| Czarniecka 2015* (17) | M. Sklodowska-Curie Memorial Institute            | BRAF           | Direct sequencing                                 | 233                      | 46.2              | 90                        |
| de Biase 2015* (16)   | Multicenter (Italy)                               | BRAF<br>TERT   | Direct sequencing<br>NGS                          | 288                      | 48                | 58                        |
| Dettmer 2015 (60)     | University of Zurich                              | BRAF<br>TERT   | Pyrosequencing/IHC<br>Direct sequencing           | 125                      | ND                | 82                        |
| Fernandez 2013 (27)   | Univ. Hospital of Bologna                         | BRAF           | Direct sequencing                                 | 297                      | 50.1              | 49.8                      |
| Fraser 2016 (24)      | University of Sydney                              | BRAF           | IHC                                               | 496                      | 47.5              | 56.9 <sup>b</sup>         |
| Gandolfi 2015* (19)   | Arcispedale S. Maria Nuova-IRCCS                  | BRAF<br>TERT   | Direct sequencing                                 | 121                      | 48.1              | 124 <sup>b</sup>          |
| George 2015 (63)      | MD Anderson Cancer Center                         | BRAF<br>TERT   | NGS<br>NGS                                        | 256<br>242               | 45.3 <sup>a</sup> | 112                       |
| Guerra 2012 (64)      | Ospedale S. Paolo and Fondazione IRCCS Ca' Granda | BRAF           | Direct sequencing / pyrosequencing                | 156                      | 45.9 <sup>a</sup> | 61.2                      |
| Hara 1994 (48)        | University of Chicago Medical Center              | RAS            | Oligonucleotide hybridization                     | 91                       | ND                | 169.2 <sup>b</sup>        |
| Henke 2015 (7)        | Washington Univ. School of Medicine               | BRAF           | PCR-RFLP                                          | 508                      | 45.5              | 96                        |
| Hong 2014* (21)       | Seoul National University Hospital                | BRAF           | PCR-RFLP / Direct sequencing                      | 2624                     | 47.2              | 31.2                      |
| Ito 2014 (6)          | Kuma Hospital                                     | BRAF           | Direct sequencing                                 | 766                      | 50.8              | 130 <sup>b</sup>          |
| Kim 2006 (26)         | University of Ulsan                               | BRAF           | Direct sequencing                                 | 203                      | 44                | 87.6                      |
| Kim 2015 (29)         | Samsung Medical Center                            | BRAF           | Direct sequencing                                 | 3019                     | ND                | 35 <sup>b</sup>           |
| Kim 2016 (32)         | Samsung Medical Center                            | BRAF<br>TERT   | Direct sequencing / MEMO PCR<br>Direct sequencing | 327                      | 44 <sup>a</sup>   | 156                       |
| Lee 2013 (28)         | Samsung Medical Center                            | BRAF           | Direct sequencing                                 | 605                      | 46.8              | 23.6 <sup>b</sup>         |
| Lee 2016 (59)         | Konkuk Univ. School of Medicine                   | BRAF<br>TERT   | Pyrosequencing<br>Direct sequencing               | 207                      | 47.5              | 48                        |
| Lin 2016 (65)         | Taipei Veterans General Hospital                  | BRAF           | Direct sequencing                                 | 78                       | 46.6              | 76.9 <sup>b</sup>         |
| Melo 2014 (9)         | University of Porto                               | TERT           | Direct sequencing                                 | 229                      | 44.8              | 93.6 <sup>b</sup>         |
| Musholt 2010 (66)     | Hannover Univ. Medical School                     | BRAF           | Mutation-specific PCR                             | 280                      | 48.4              | 60                        |

|                      |                                                         |      |                   |      |                 |                   |
|----------------------|---------------------------------------------------------|------|-------------------|------|-----------------|-------------------|
| Onder 2016* (20)     | Istanbul Univ.                                          | BRAF | Direct sequencing | 50   | 14.74           | 70 <sup>b</sup>   |
| Prescott 2012 (67)   | Massachusetts General Hospital                          | BRAF | SNE               | 205  | ND              | 60                |
| Renaud 2014 (68)     | Lille Univ. Hospital                                    | BRAF | Pyrosequencing    | 94   | 42.3            | 122 <sup>b</sup>  |
| Russo 2014* (18)     | Garibaldi-Nesima Hospital                               | BRAF | Direct sequencing | 103  | 44.2            | 55 <sup>b</sup>   |
| Song 2016 (50)       | Seoul National Univ. Hospital                           | TERT | Direct sequencing | 432  | 45.5            | 57.6              |
| Stanojevic 2011 (69) | Institute of Oncology and Radiology of Serbia, Belgrade | BRAF | Direct sequencing | 266  | 48              | 62.9 <sup>b</sup> |
| Xing 2009 (25)       | John Hopkins Hospital                                   | BRAF | Direct sequencing | 129  | 45 <sup>a</sup> | 36                |
| Xing 2013 (22)       | Multicenter                                             | BRAF | Various methods   | 1826 | 46 <sup>a</sup> | 33                |
| Xing 2014 (8)        | John Hopkins Hospital                                   | BRAF | Direct sequencing | 507  | 47.3            | 26                |
| Xing 2015 (5)        | Multicenter                                             | TERT | Direct sequencing |      |                 |                   |
| Yim 2014 (42)        | Asan Medical Center                                     | BRAF | Various methods   | 2099 | 45 <sup>a</sup> | 36                |
|                      |                                                         | BRAF | Direct sequencing | 164  | 43.9            | 132               |

---

Abbreviation: DFS, disease-free survival; DSS, disease-specific survival; ND, no description; KMC, Kaplan Meier curve; HR, hazard ratio; NGS, next-generation sequencing; SSCP, single strand conformation polymorphism; RFLP, restriction fragment length polymorphism; MEMO, mutant enrichment with 3'-modified oligonucleotides; SNE, single-nucleotide extension

\* The authors provided unpublished data of HR via email

<sup>a</sup> Median value of age

<sup>b</sup> Mean value of follow-up
