# Supplementary material for: A meta-analysis of prognostic roles of molecular markers in papillary thyroid carcinoma
Source: PubMed Central journal article supplement — Endocr Connect. 2017 Feb 20;6(3):R8–R17. doi: 10.1530/EC-17-0010 (PMC5424840; doi:10.1530/ec-17-0010), 2017-02-20
Supplement: ec-6-R8-t002.pdf [file ec-6-R8-t002.pdf]

**Supplementary Table 2. The prevalence of each genotype subgroup when combining *BRAF* and *TERT* promoter mutations**

| Author             | Total patients | Mean age | No. of patients              |                    |                    |                              |
|--------------------|----------------|----------|------------------------------|--------------------|--------------------|------------------------------|
|                    |                |          | <i>BRAF</i> -/ <i>TERT</i> - | <i>BRAF</i> + only | <i>TERT</i> + only | <i>BRAF</i> +/ <i>TERT</i> + |
| de Biase 2015 (16) | 374            | 47.4     | 131                          | 224                | 6                  | 13                           |
| Gandolfi 2015 (19) | 121            | 48.1     | 58                           | 42                 | 9                  | 12                           |
| Lee 2016 (59)      | 207            | 46.0     | 29                           | 148                | 3                  | 27                           |
| Liu 2016 (31)      | 1051           | 46.0     | 629                          | 292                | 64                 | 66                           |
| Song 2016 (50)     | 418            | 45.3     | 162                          | 239                | 5                  | 12                           |
| Xing 2014 (8)      | 507            | 45.9     | 287                          | 159                | 26                 | 35                           |
| Overall (%)        | 2678           |          | 1296<br>(48.4%)              | 1104<br>(41.2%)    | 113<br>(4.2%)      | 165<br>(6.2%)                |
