# Supplementary material for: A meta-analysis of prognostic roles of molecular markers in papillary thyroid carcinoma
Source: PubMed Central journal article supplement — Endocr Connect. 2017 Feb 20;6(3):R8–R17. doi: 10.1530/EC-17-0010 (PMC5424840; doi:10.1530/ec-17-0010), 2017-02-20
Supplement: ec-6-R8-t003.pdf [file ec-6-R8-t003.pdf]

**Supplementary Table 3. Newcastle Ottawa Quality Assessment Scale for included studies**

| Author               | DOMAIN    |               |          | Total stars |
|----------------------|-----------|---------------|----------|-------------|
|                      | Selection | Comparability | Exposure |             |
| Abubaker 2008 (61)   | 3         | 0             | 2        | 5           |
| Alzahrani 2013 (23)  | 3         | 0             | 1        | 4           |
| Bullock 2015 (62)    | 3         | 0             | 3        | 6           |
| Costa 2008 (30)      | 3         | 0             | 2        | 5           |
| Czarniecka 2015 (17) | 3         | 1             | 3        | 7           |
| de Biase 2015 (16)   | 3         | 0             | 2        | 5           |
| Dettmer 2015 (60)    | 3         | 0             | 3        | 6           |
| Fernandez 2013 (27)  | 3         | 0             | 2        | 5           |
| Fraser 2016 (24)     | 3         | 0             | 2        | 5           |
| Gandolfi 2015 (19)   | 3         | 0             | 2        | 5           |
| George 2015 (63)     | 3         | 0             | 3        | 6           |
| Guerra 2012 (64)     | 3         | 1             | 2        | 6           |
| Hara 1994 (48)       | 3         | 0             | 3        | 6           |
| Henke 2015 (7)       | 3         | 0             | 3        | 6           |
| Ito 2014 (6)         | 3         | 1             | 3        | 7           |
| Kim 2006 (26)        | 3         | 0             | 3        | 6           |
| Kim 2015 (29)        | 3         | 1             | 2        | 6           |
| Kim 2016 (32)        | 3         | 0             | 3        | 6           |
| Lee 2013 (28)        | 3         | 0             | 2        | 5           |
| Lee 2016 (59)        | 3         | 0             | 2        | 5           |
| Lin 2016 (65)        | 3         | 0             | 3        | 6           |
| Melo 2014 (9)        | 3         | 0             | 3        | 6           |
| Musholt 2010 (66)    | 3         | 0             | 3        | 6           |
| Onder 2016 (20)      | 3         | 0             | 3        | 6           |
| Prescott 2012 (67)   | 3         | 1             | 3        | 7           |
| Renaud 2014 (68)     | 3         | 0             | 3        | 6           |
| Russo 2014 (18)      | 3         | 1             | 2        | 6           |
| Song 2016 (50)       | 3         | 0             | 2        | 5           |
| Stanojevic 2011 (69) | 3         | 1             | 3        | 7           |
| Xing 2009 (25)       | 3         | 0             | 2        | 5           |
| Xing 2013 (22)       | 3         | 0             | 2        | 5           |
| Xing 2014 (8)        | 3         | 0             | 3        | 6           |
| Xing 2015 (5)        | 3         | 1             | 2        | 6           |
| Yim 2014 (42)        | 3         | 0             | 3        | 6           |
